# Supplementary material
Source: PubMed Central journal article supplement (PMC3005560)
Supplement: NIHMS255439-supplement-supplement_1.pdf [file NIHMS255439-supplement-supplement_1.pdf]

## Supplementary Material

### HPLC, Mass spectra and two-dimensional NMR spectra for peptidomimetics.

System : beckman nouveau  
Column : GEMINI C18; 4.6 x 250mm  
Solvent : A=0.1%TFA/water, B=0.1%TFA/ACN  
Flow : 1ml/min.  
Detector : 215nm  
File : c:\instru~1\data\Ys1-40.dd1  
Sample ID : 8-13  
Acquired : Mar 07, 2008 09:25:00

Channel A Method  
YS1-40 287061-11(8-13)  
15-65%B IN 25 MIN/H2O

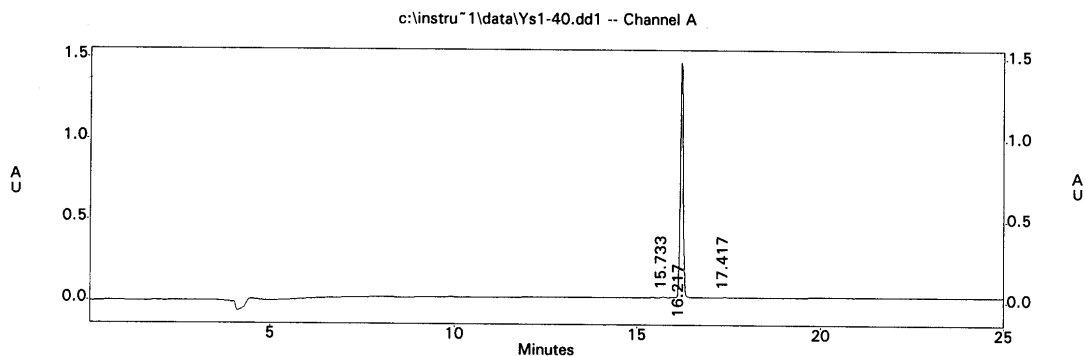

Figure 1. HPLC chromatogram for compound HERP5.

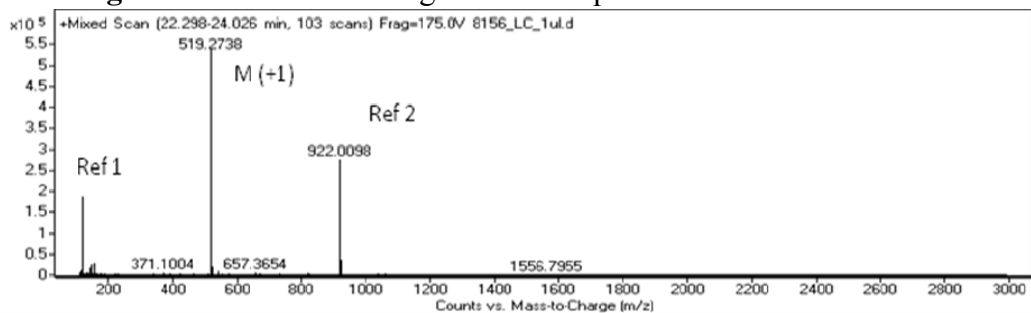

Figure 2. High resolution mass spectrum for compound HERP5

Flow rate : 1.0 mL/min  
 Wavelength : 220nm  
 Volume : 5ul

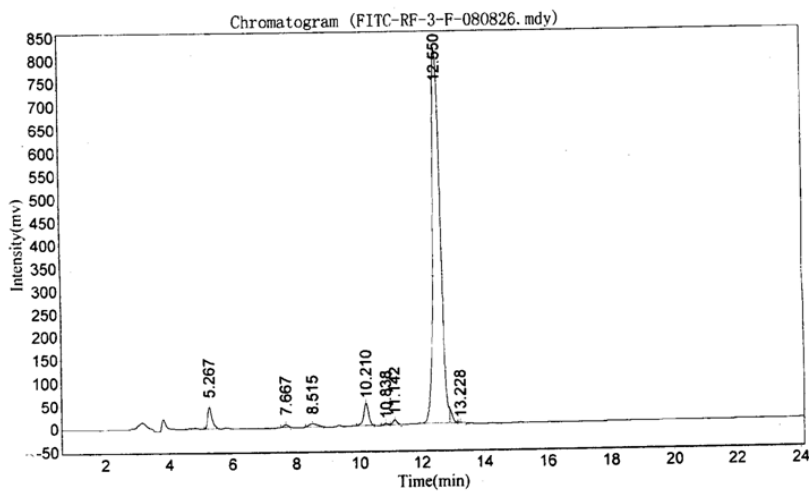

Results

Figure 3. HPLC chromatogram fluorescently labeled compound FITC-HERP5

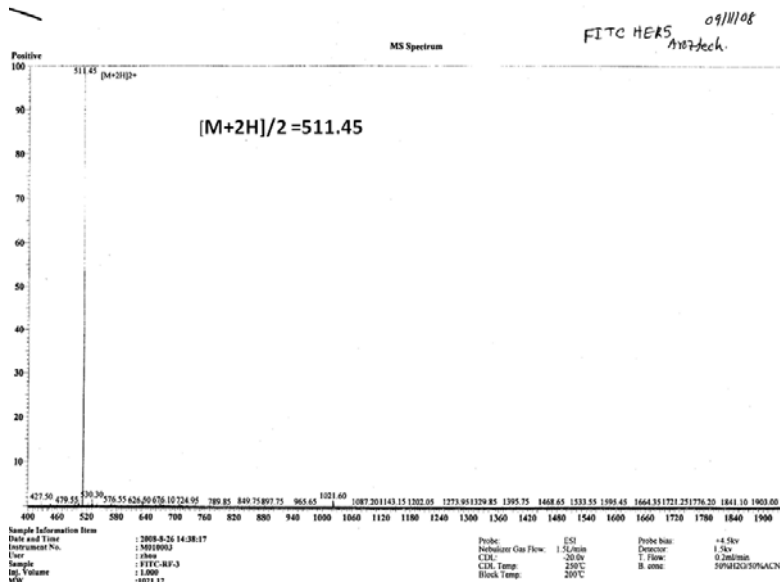

Figure 4. Mass spectrum for fluorescently labeled compound FITC-HERP5.

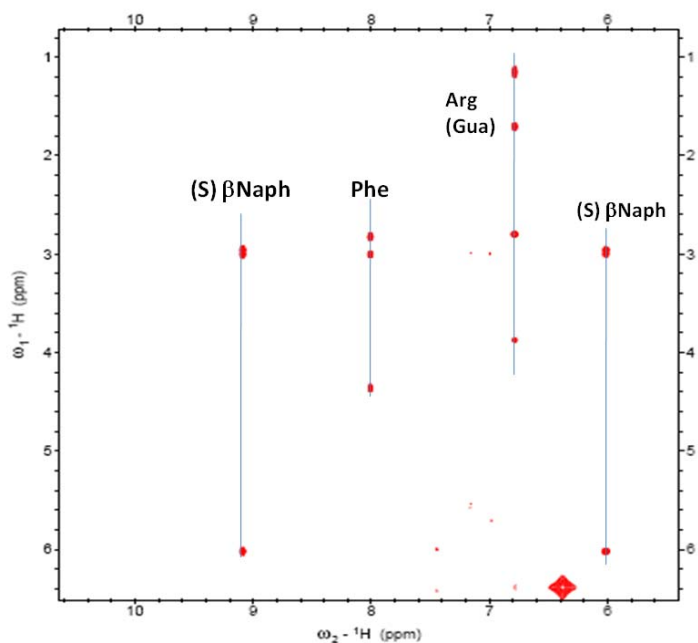

**Figure 5.**  $^1\text{H}$  2D-TOCSY NMR spectrum of HERP5 in  $\text{H}_2\text{O}/\text{D}_2\text{O}$  at 298 K showing fingerprint region.

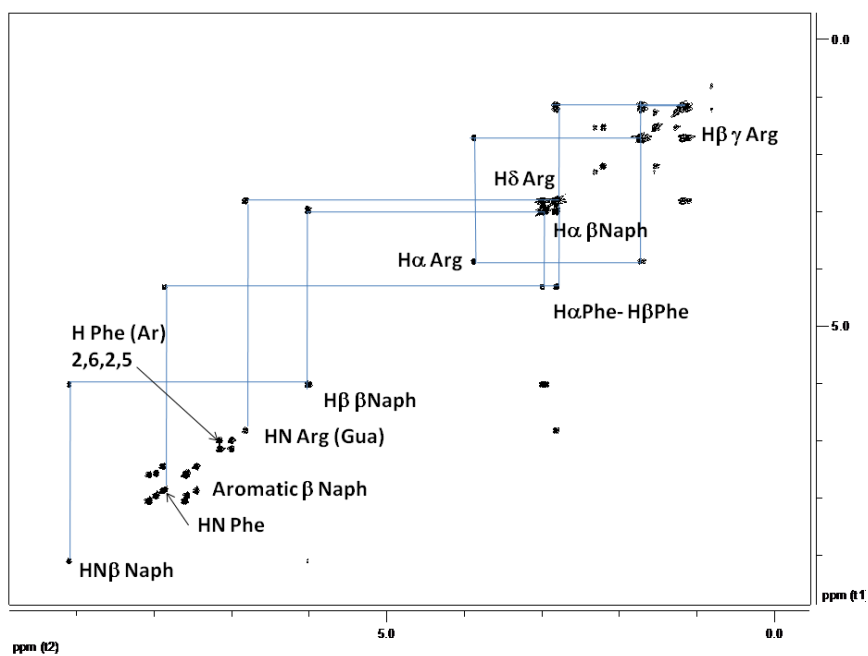

**Figure 6.**  $^1\text{H}$  2D-DQF-COSY NMR spectrum of HERP5 in  $\text{H}_2\text{O}/\text{D}_2\text{O}$  at 298 K showing assignments. Ar –aromatic resonances, Gua-guanidine group.

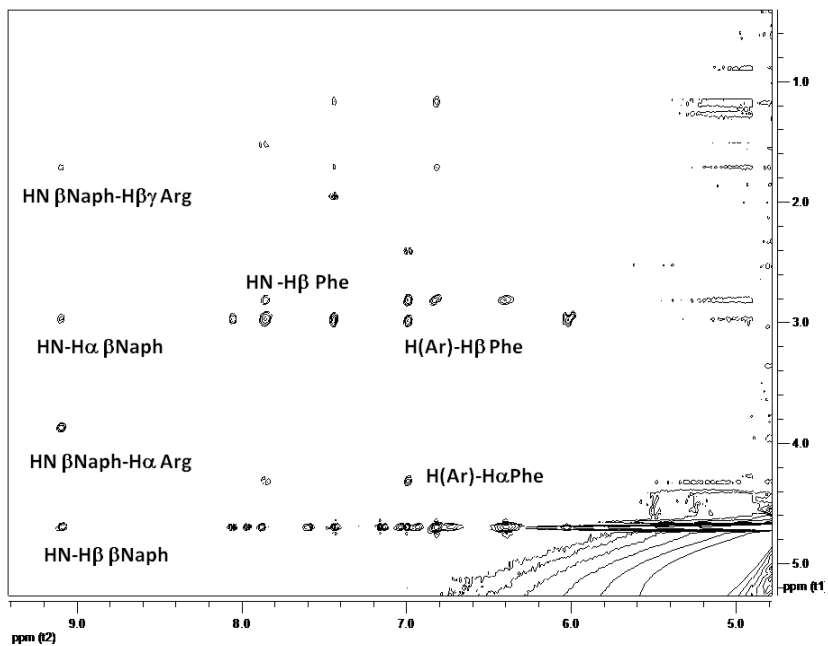

**Figure 7.**  $^1\text{H}$  2D-ROESY NMR spectrum of HERP5 in  $\text{H}_2\text{O}/\text{D}_2\text{O}$  at 298 K showing amide to aliphatic connectivities with assignments.

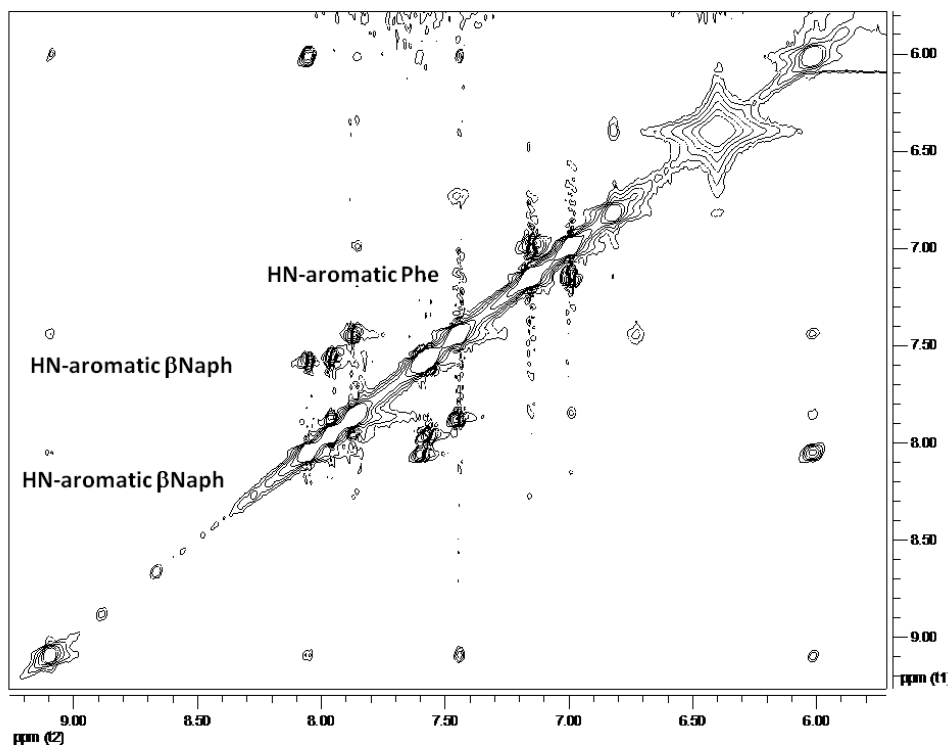

**Figure 8.**  $^1\text{H}$  2D-ROESY NMR spectrum of HERP5 in  $\text{H}_2\text{O}/\text{D}_2\text{O}$  at 298 K showing amide and aromatic region.

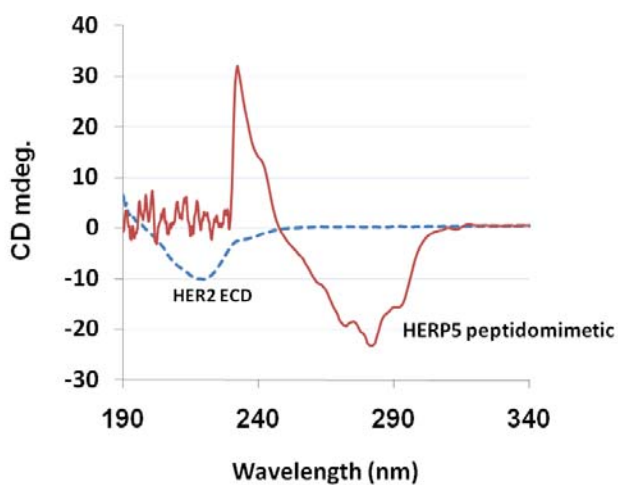

**Figure 9.** CD spectra of HER2 protein extracellular domain at 6.5  $\mu\text{M}$  and HERP5 peptidomimetic at 1.3 mM in water. Notice that the CD spectra of HER2 protein and HERP5 peptidomimetic do not have overlapping CD bands.

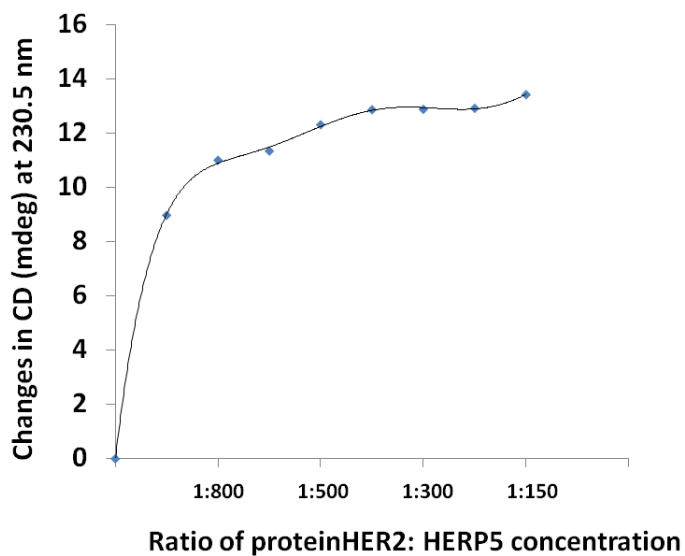

**Figure 10.** Changes in the CD signal of the peptidomimetic HERP5 at 230.5 nm upon addition of HER2 protein extracellular domain at different proteinHER2: HERP5 ratio. Changes in CD spectra are calculated by subtracting the different spectra from HERP5 spectra without the protein.

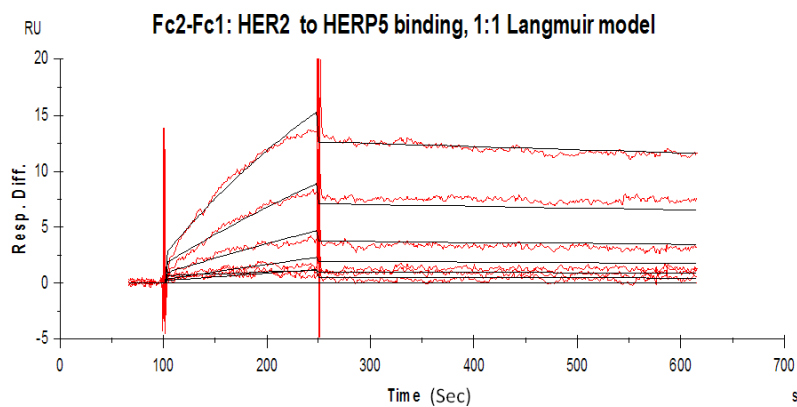

**Figure 11.** Preliminary results of Surface Plasmon Resonance (SPR) analysis of interaction between the HER2 extracellular domain and the HERP5 peptidomimetic. Difference in dose response compared to the control is shown in the figure. 1:1 Langmuir model was used to fit the data to obtain  $k_{on}$  and  $k_{off}$  values.  $K_d$  value calculated was around 1  $\mu\text{M}$ . Peptidomimetic was immobilized on CM5 chip with 10  $\mu\text{g}/\text{mL}$  in 10 mM sodium acetate pH 5.0 at a flow of 10  $\mu\text{L}/\text{min}$  for 7 min. An analogue of HERP5 was used as negative control. Different concentration of extracellular domain of the HER2 protein (0, 5, 10, 20, 40, 80, 160  $\mu\text{M}$ ) was injected to flow on the chip at a flow rate of 30  $\mu\text{L}/\text{min}$ .

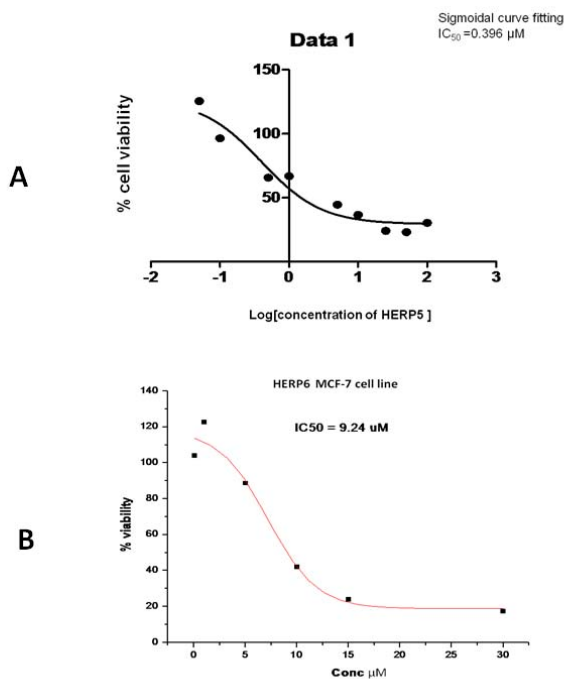

**Figure 12.** Example of different dose response curves plotted to calculate  $IC_{50}$  values for the compounds. A) plot of log of concentration of the compound vs % cell viability. B) concentration of compound vs cell viability

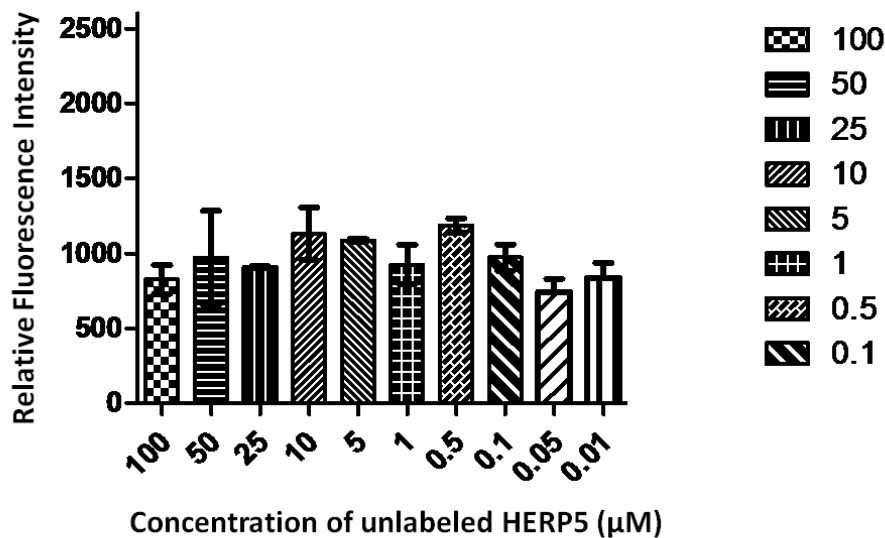

**Figure 13.** Competitive binding of unlabeled HERP5 to MCF-7 cells. Fluorescence of the FITC-labeled HERP5 is monitored to observe competitive binding. Concentration of unlabeled HERP5 was varied (100  $\mu\text{M}$  to 0.01  $\mu\text{M}$ ). Graph indicates that binding of HERP5 to MCF-7 cells is non-specific.

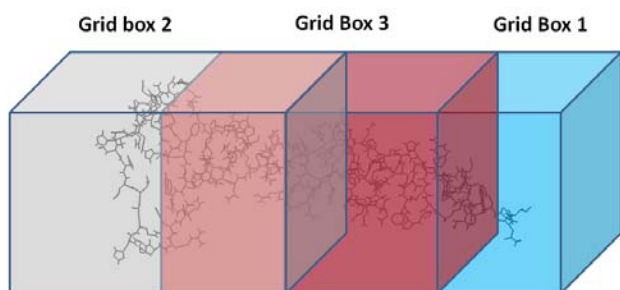

**Figure 14.** Schematic diagram of three-grid boxes used for docking of HERP5 to the entire domain IV of HER2 protein. Notice the overlapping in grid boxes. Grid box 2 contains interface of domain III and domain IV.
